# Supplementary material for: A randomised study of rituximab and belimumab sequential therapy in PR3 ANCA-associated vasculitis (COMBIVAS): design of the study protocol
Source: Springer Nature journal article supplement (doi:10.1186/s13063-023-07218-y), 2023-03-11
Supplement: MOESM3 [file 13063_2023_7218_MOESM3_ESM.pdf]

Table 3 Treatment and follow-up period

| Procedure                                           | Year 1 –Treatment Period |   |   |    |    |    |    |     |     |     |                |     |                |     |                |     | Year 2 –Follow-up |          |          |           | Unscheduled visit <sup>14,15</sup> | Early Withdrawal <sup>16</sup>     |                       |
|-----------------------------------------------------|--------------------------|---|---|----|----|----|----|-----|-----|-----|----------------|-----|----------------|-----|----------------|-----|-------------------|----------|----------|-----------|------------------------------------|------------------------------------|-----------------------|
|                                                     | Trial Day <sup>1</sup>   | 1 | 8 | 22 | 29 | 57 | 85 | 113 | 141 | 169 | 197            | 225 | 253            | 281 | 309            | 337 | 365               | 456      | 547      | 638       | 729                                | End of Therapy visit <sup>17</sup> | 8 week post last dose |
| Trial Week <sup>1</sup>                             |                          | 1 | 3 | 4  | 8  | 12 | 16 | 20  | 24  | 28  | 32             | 36  | 40             | 44  | 48             | 52  | 65 (M15)          | 78 (M18) | 91 (M21) | 104 (M24) |                                    |                                    |                       |
| Visit to trial centre                               | X                        | X | X | X  | X  | X  | X  | X   | X   | X   |                | X   |                | X   |                | X   | X                 | X        | X        | X         | X                                  | X                                  | X                     |
| Randomisation <sup>2</sup>                          | X                        |   |   |    |    |    |    |     |     |     |                |     |                |     |                |     |                   |          |          |           |                                    |                                    |                       |
| Training on use of prefilled syringe                | X                        |   |   |    |    |    |    |     |     |     |                |     |                |     |                |     |                   |          |          |           |                                    |                                    |                       |
| Dispense Belimumab / belimumab–placebo <sup>3</sup> | X                        |   |   | X  | X  | X  | X  | X   | X   | X   |                | X   |                | X   |                |     |                   |          |          |           |                                    |                                    |                       |
| Rituximab(IV) <sup>4</sup>                          |                          | X | X |    |    |    |    |     |     |     |                |     |                |     |                |     |                   |          |          |           |                                    |                                    |                       |
| AE/SAE review <sup>5,6</sup>                        | X                        | X | X | X  | X  | X  | X  | X   | X   | X   | X <sup>6</sup> | X   | X <sup>6</sup> | X   | X <sup>6</sup> | X   | X                 | X        | X        | X         | X                                  | X                                  | X                     |
| Concomitant medication review                       | X                        | X | X | X  | X  | X  | X  | X   | X   | X   |                | X   |                | X   |                | X   | X                 | X        | X        | X         | X                                  | X                                  | X                     |
| Dispense / review patient diaries                   | X                        |   |   | X  | X  | X  | X  | X   | X   | X   |                | X   |                | X   |                | X   |                   |          |          |           |                                    |                                    |                       |
| Return patient injection diary                      |                          |   |   |    |    |    |    |     |     |     |                |     |                |     |                | X   |                   |          |          |           |                                    |                                    |                       |
| AAV-PRO <sup>7</sup>                                | X                        |   |   |    |    | X  |    |     | X   |     |                |     |                |     |                | X   |                   | X        |          | X         |                                    | X                                  |                       |
| BVAS/WG                                             | X                        |   |   | X  | X  | X  | X  | X   | X   | X   |                | X   |                | X   |                | X   | X                 | X        | X        | X         | X                                  | X                                  |                       |
| Vasculitis Damage Index(VDI)                        | X                        |   |   |    |    |    |    |     | X   |     |                |     |                |     |                | X   |                   | X        |          | X         |                                    | X                                  |                       |
| C-SSRS                                              | X                        | X | X | X  | X  | X  | X  | X   | X   | X   |                | X   |                | X   |                | X   | X                 | X        | X        | X         | X                                  | X                                  | X                     |
| Symptom–driven physical exam                        | X                        | X | X | X  | X  | X  | X  | X   | X   | X   |                | X   |                | X   |                | X   | X                 | X        | X        | X         | X                                  | X                                  | X                     |
| Neurological Assessment                             | X                        | X | X | X  | X  | X  | X  | X   | X   | X   |                | X   |                | X   |                | X   | X                 | X        | X        | X         | X                                  | X                                  | X                     |
| Urine pregnancytest (WOCBP only) <sup>8</sup>       | X                        |   |   | X  | X  | X  | X  | X   | X   | X   | X <sup>8</sup> | X   | X <sup>8</sup> | X   | X <sup>8</sup> | X   | X                 | X        |          |           | X                                  | X                                  |                       |
| Urine dipstick, urine microscopy, UPCR              | X                        |   |   | X  | X  | X  | X  | X   | X   | X   |                | X   |                | X   |                | X   | X                 | X        | X        | X         | X                                  | X                                  |                       |

| Procedure                                                   | Year 1 –Treatment Period |                 |    |    |    |                 |     |     |     |     |     |     |     |     |     |     | Year 2 –Follow-up |          |          |           | Unscheduled visit <sup>14,15</sup> | Early Withdrawal <sup>16</sup>     |                       |
|-------------------------------------------------------------|--------------------------|-----------------|----|----|----|-----------------|-----|-----|-----|-----|-----|-----|-----|-----|-----|-----|-------------------|----------|----------|-----------|------------------------------------|------------------------------------|-----------------------|
| Trial Day <sup>1</sup>                                      | 1                        | 8               | 22 | 29 | 57 | 85              | 113 | 141 | 169 | 197 | 225 | 253 | 281 | 309 | 337 | 365 | 456               | 547      | 638      | 729       |                                    | End of Therapy visit <sup>17</sup> | 8 week post last dose |
| Trial Week <sup>1</sup>                                     |                          | 1               | 3  | 4  | 8  | 12              | 16  | 20  | 24  | 28  | 32  | 36  | 40  | 44  | 48  | 52  | 65 (M15)          | 78 (M18) | 91 (M21) | 104 (M24) |                                    |                                    |                       |
| Visit to trial centre                                       | X                        | X               | X  | X  | X  | X               | X   | X   | X   | X   |     | X   |     | X   |     | X   | X                 | X        | X        | X         | X                                  | X                                  | X                     |
| Routine bloods <sup>9,10</sup>                              | X                        |                 |    | X  | X  | X <sup>10</sup> | X   | X   | X   | X   |     | X   |     | X   |     | X   | X                 | X        | X        | X         | X                                  | X                                  | X                     |
| PR3 ANCA(research sample)                                   | X                        |                 |    | X  | X  | X               | X   | X   | X   | X   |     | X   |     | X   |     | X   | X                 | X        | X        | X         | X <sup>15</sup>                    | X                                  |                       |
| Blood leukocyte analysis                                    | X                        | X               |    |    |    | X               |     |     |     |     |     |     |     |     |     | X   |                   | X        |          | X         | X <sup>15</sup>                    | X                                  |                       |
| Transcriptomics (whole blood)                               | X                        |                 |    |    |    | X               |     |     |     |     |     |     |     |     |     | X   |                   | X        |          | X         | X <sup>15</sup>                    | X                                  |                       |
| Exploratory blood biomarkers                                | X                        | X <sup>11</sup> |    |    |    | X               |     |     |     |     |     |     |     |     |     | X   |                   | X        |          | X         | X <sup>15</sup>                    | X                                  |                       |
| Urine proteomics                                            | X                        |                 |    |    |    | X               |     |     |     |     |     |     |     |     |     | X   |                   |          |          | X         | X <sup>15</sup>                    | X                                  |                       |
| Urine lymphocytes                                           | X                        |                 |    |    |    | X               |     |     |     |     |     |     |     |     |     | X   |                   |          |          | X         | X <sup>15</sup>                    | X                                  |                       |
| BlyS, BlyS–Beli complex, cytokines                          | X                        |                 |    |    |    | X               |     |     | X   |     |     | X   |     |     |     | X   | X                 | X        | X        | X         | X <sup>15</sup>                    | X                                  |                       |
| Lymph node and nasal biopsy (if consented) <sup>12,13</sup> | X                        |                 |    |    |    | X               |     |     |     |     |     |     |     |     |     |     |                   |          |          |           |                                    |                                    |                       |
| Nasal swab (microbiome)                                     | X                        |                 |    |    |    | X               |     |     |     |     |     |     |     |     |     |     |                   |          |          |           |                                    |                                    |                       |

**Footnotes:**

- Visits for Day 8, Day 22 and Week 4 must occur within a +/-3day window of the scheduled visit. Visits for Week 8 to Week 52 must occur within a +/-7day window of the scheduled visit. Visits for Month 15 to Month 24 must occur within a +/-14-daywindow of the scheduled visit.
- Randomisation can occur on D1 or during screening period after all eligibility criteria have been met.
- All samples must be taken before first belimumab/belimumab–placebo. First dose to be given in clinic under supervision with 3 hours observation post–dose. Thereafter, the patient will self-administer at home on weekly basis. Patients will be provided with sufficient doses of belimumab/belimumab–placebo to cover the time between scheduled visits.
- The 2nd and 4th dose of belimumab should not be given on the same day as rituximab. Administration of each drug must remain within the defined time window (belimumab: Day 8 and 22 +/-1day; rituximab: Day 8 and 22 +/-3days).** On Days of Rituximab infusion, pre-medication will be administered 30 minutes prior to infusion. Observation is required for 1 hour post dose.
- Please note: recording of all adverse events must start from the point of informed consent regardless of whether a participant has yet received a medicinal product.
- At Weeks 32, 40, 48, when no visit is scheduled, site must telephone the participants to check for AE/SAE (including suicidal ideation) and if needed arrange an unscheduled visit.
- AAV–PRO should be completed prior to other clinical assessments.
- Home urine pregnancy test on weeks 32, 40 and 48, with telephone follow–up. Pregnancy testing is only mandated for WOCBP up until 16 weeks post last MP dose.
- Routine bloods include FBC (incl. WCC with differential), urea, creatinine, eGFR, sodium, potassium, bilirubin, ALT (or AST), ALP, CRP, ESR, glucose, immunoglobulins.
